# Supplementary material for: Spoilage Potential of Pseudomonas (P. fragi, P. putida) and LAB (Leuconostoc mesenteroides, Lactobacillus sakei) Strains and Their Volatilome Profile during Storage of Sterile Pork Meat Using GC/MS and Data Analytics
Source: PubMed Central journal article supplement (PMC7278706; doi:10.3390/foods9050633), 2020-05-14
Supplement: foods-09-00633-s001.pdf [file foods-09-00633-s001.pdf]

**Table S1.** Coded names for sterile meat and the inoculated meat samples with the monocultures, dual and mixed cultures of the 4 examined strains at 4 and 10 °C.

| Sample                     | Coded names                                                                                      |
|----------------------------|--------------------------------------------------------------------------------------------------|
| Sterile pork meat          | Control (B)                                                                                      |
| Monocultures               | <i>Pseudomonas fragi</i> (F4, F10)                                                               |
|                            | <i>Pseudomonas putida</i> (P4, P10)                                                              |
|                            | <i>Lactobacillus sakei</i> (S4, S10)                                                             |
|                            | <i>Leuconostoc mesenteroides</i> (M4, M10)                                                       |
| Dual cultures              | <i>P. fragi</i> and <i>P. putida</i> (CF4, CF10)                                                 |
|                            | <i>Lb. sakei</i> and <i>Ln. mesenteroides</i> (MF4, MF10)                                        |
| Mixed culture of 4 strains | <i>P. fragi</i> and <i>P. putida</i> and <i>Lb. sakei</i> and <i>Ln. mesenteroides</i> (C4, C10) |

**Table S2:** Sensory analysis of pork meat in correlation to storage time and population level, stored aerobically at 4 and 10 °C.

| Samples                      | Air 4 °C                |                 |                  | Air 10 °C               |            |         |
|------------------------------|-------------------------|-----------------|------------------|-------------------------|------------|---------|
|                              | Inoculum<br>(log CFU/g) | Semi-Fresh      | Spoiled          | Inoculum<br>(log CFU/g) | Semi-Fresh | Spoiled |
| <b>Monoculture</b>           |                         |                 |                  |                         |            |         |
| <i>P. fragi</i> (F)          | 2.01 <sup>1</sup>       | 4.40            | 7.09             | 2.03                    | 5.63       | 8.31    |
| Time (h)                     | 0                       | 54 <sup>2</sup> | 116 <sup>3</sup> | 0                       | 42         | 72      |
| <i>P. putida</i> (P)         | 2.33                    | 2.16            | 2.58             | 2.57                    | 5.20       | 8.40    |
| Time (h)                     | 0                       | 68              | 140              | 0                       | 42         | 80      |
| <i>Ln, mesenteroides</i> (M) | 1.76                    | 2.54            | 3.36             | 2.14                    | 5.36       | 7.62    |
| Time (h)                     | 0                       | 92              | 124.5            | 0                       | 46         | 93      |
| <i>L. sakei</i> (S)          | 1.75                    | 2.40            | 3.57             | 1.74                    | 3.26       | 6.23    |
| Time (h)                     | 0                       | 92              | 140              | 0                       | 42         | 93      |
| <b>Dual Culture</b>          |                         |                 |                  |                         |            |         |
| F + P (CF)                   | 2.32                    | 5.11            | 6.74             | 2.25                    | 4.00       | 8.52    |
| Time (h)                     | 0                       | 68              | 104              | 0                       | 26         | 72      |
| M + S (MF)                   | 2.26                    | 2.46            | 4.76             | 2.22                    | 4.12       | 7.23    |
| Time (h)                     | 0                       | 54              | 140              | 0                       | 34         | 80      |
| <b>Cocktail</b>              |                         |                 |                  |                         |            |         |
| CF (cocktail)                | 2.25                    | 3.76            | 6.49             | 1.90                    | 2.70       | 6.94    |
| Time (h)                     | 0                       | 54              | 104              | 0                       | 22         | 80      |
| MF (cocktail)                | 2.37                    | 2.54            | 3.73             | 2.95                    | 3.01       | 6.19    |
| Time                         | 0                       | 54              | 104              | 0                       | 22         | 80      |

<sup>1</sup>: population below the detection limit of the method; <sup>2</sup>: time that the sensory panel classified the sample as Semi Fresh; <sup>3</sup>: time that the sensory panel classified the sample as Spoiled

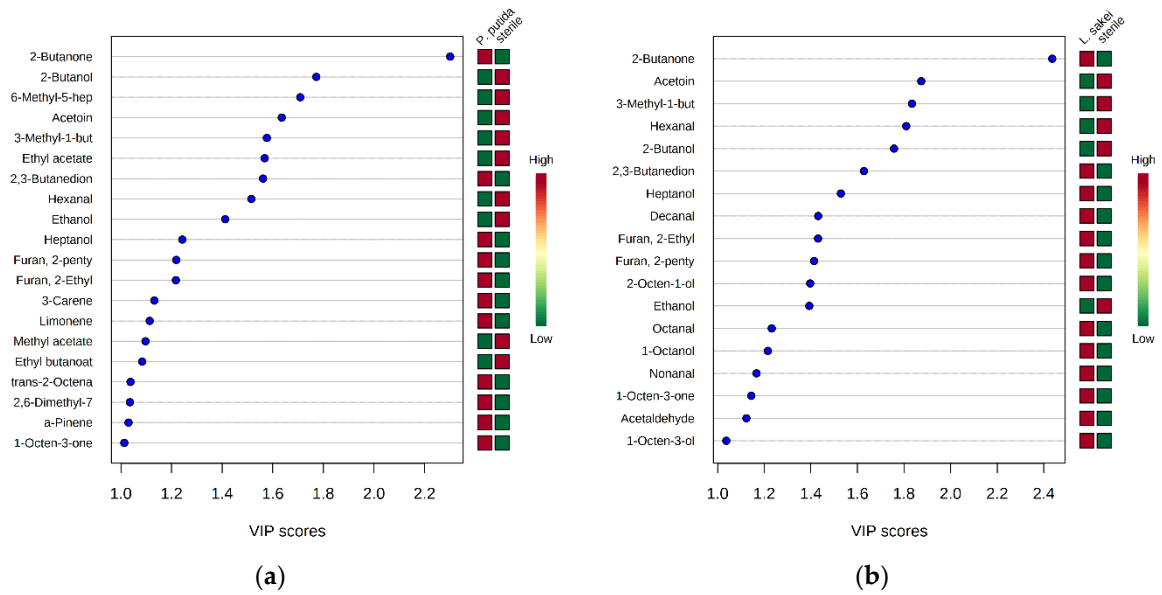

**Figure S1.** Important features identified by PLS-DA for sterile meat and meat inoculated with: (a) *P. putida* (monoculture); (b) and *L. sakei* (monoculture) stored at 4 and 10 °C. The color scale represents the scaled abundance of each variable, with red indicating high abundance and green indicating low abundance.

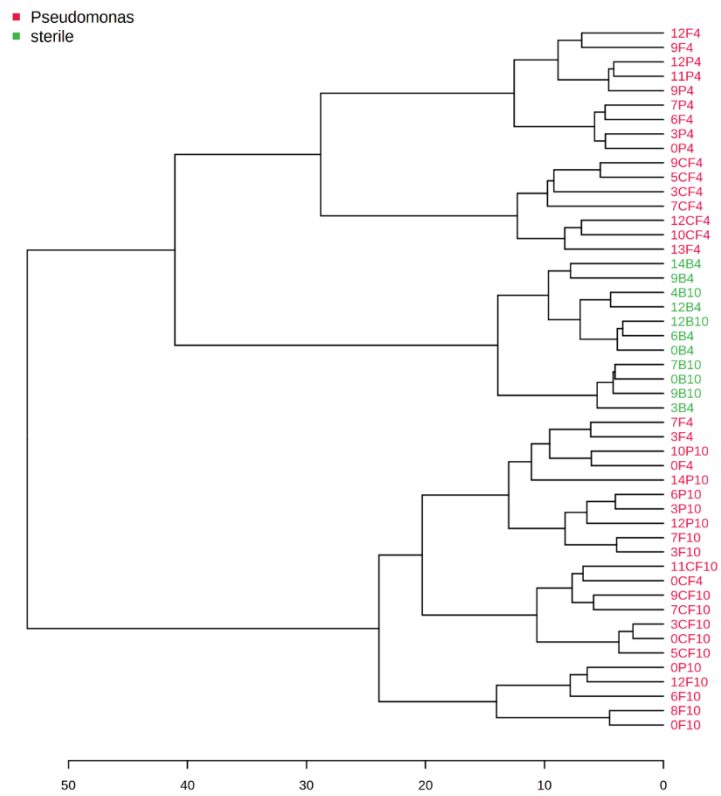

**Figure S2:** Dendrogram obtained after Ward-linkage clustering based on the Euclidean correlation coefficients of the 51 volatiles identified for the sterile meat and meat inoculated with mono and dual cultures of pseudomonads. The description of coded treatments is referred to Table S1.

**Table S3.** 51 Volatile compounds identified in sterile and inoculated pork samples that were further used in statistical analysis and association to the discrimination process.

| Name                           | Target ion | RI <sub>exp</sub> <sup>1</sup> | RI <sub>ref</sub> <sup>2</sup> | Reliability of Identification <sup>3</sup> |
|--------------------------------|------------|--------------------------------|--------------------------------|--------------------------------------------|
| Acetaldehyde                   | 29         | 407                            | 404                            | A                                          |
| Ethanol                        | 45         | 437                            | 427                            | A                                          |
| Dimethyl sulfide               | 62         | 520                            | 520                            | B                                          |
| Methyl acetate                 | 74         | 527                            | 526                            | A                                          |
| Propanol                       | 31         | 555                            | 555                            | A                                          |
| 2,3-Butanedione                | 86         | 594                            | 595                            | A                                          |
| 2-Butanone                     | 72         | 601                            | 598                            | B                                          |
| 2-Butanol                      | 45         | 603                            | 603                            | B                                          |
| Ethyl acetate                  | 61         | 613                            | 606                            | A                                          |
| 1-Butanol                      | 56         | 658                            | 659                            | A                                          |
| 1-Penten-3-ol                  | 57         | 675                            | 680                            | A                                          |
| 2-Pentanone                    | 43         | 686                            | 685                            | B                                          |
| Pentanal                       | 58         | 697                            | 699                            | A                                          |
| 2-Ethylfuran                   | 81         | 702                            | 703                            | B                                          |
| Acetoin (3-Hydroxy-2-butanone) | 88         | 720                            | 713                            | A                                          |
| 3-Methyl-1-butanol             | 55         | 725                            | 736                            | A                                          |
| 1-Pentanol                     | 42         | 759                            | 765                            | A                                          |
| Hexanal                        | 82         | 802                            | 800                            | A                                          |
| Ethyl butanoate                | 88         | 805                            | 802                            | A                                          |
| Ethyl lactate                  | 45         | 815                            | 815                            | A                                          |
| Butyl acetate                  | 43         | 818                            | 812                            | A                                          |
| 4-methyl-1-pentanol (IS)       | 56         | 839                            | 846                            | A                                          |
| Hexanol                        | 56         | 870                            | 868                            | A                                          |
| 2-Heptanone                    | 43         | 888                            | 891                            | B                                          |
| Heptanal                       | 70         | 902                            | 901                            | B                                          |
| $\alpha$ -Thujene              | 93         | 926                            | 927                            | A                                          |
| $\alpha$ -Pinene               | 93         | 930                            | 933                            | A                                          |
| Camphene                       | 93         | 944                            | 951                            | B                                          |
| 2-Heptenal                     | 83         | 954                            | 958                            | B                                          |
| Heptanol                       | 70         | 973                            | 970                            | B                                          |
| Sabinene                       | 93         | 973                            | 974                            | B                                          |
| $\beta$ -Pinene                | 93         | 975                            | 979                            | A                                          |
| 1-Octen-3-ol                   | 57         | 980                            | 980                            | A                                          |
| 1-Octen-3-one                  | 70         | 980                            | 979                            | B                                          |
| 2,5-Octanedione                | 43         | 987                            | 984                            | C                                          |
| 6-Methyl-5-hepten-2-one        | 108        | 989                            | 986                            | C                                          |
| 2-Pentylfuran                  | 81         | 991                            | 993                            | C                                          |
| 2-Octanone                     | 58         | 993                            | 990                            | C                                          |
| Ethyl hexanoate                | 88         | 1001                           | 1000                           | A                                          |
| Octanal                        | 43         | 1003                           | 1003                           | A                                          |

|                           |     |      |      |   |
|---------------------------|-----|------|------|---|
| 3-Carene                  | 93  | 1009 | 1011 | B |
| p-Cymene                  | 119 | 1024 | 1025 | A |
| Limonene                  | 93  | 1028 | 1030 | A |
| 2-Ethyl-1-hexanol         | 57  | 1030 | 1030 | A |
| $\gamma$ -Terpinene       | 93  | 1059 | 1060 | A |
| (E)-2-Octenal             | 70  | 1060 | 1060 | B |
| 2-Octen-1-ol              | 57  | 1070 | 1066 | C |
| 1-Octanol                 | 56  | 1073 | 1071 | A |
| 2,6-Dimethyl-7-octen-2-ol | 59  | 1074 | 1081 | C |
| 2-Nonanone                | 58  | 1094 | 1092 | C |
| Nonanal                   | 57  | 1105 | 1104 | B |
| Decanal                   | 57  | 1206 | 1206 | B |

<sup>1</sup>RI experimental, <sup>2</sup>Reference from NIST14 and FFSCN, <sup>3</sup>A-level: agreement of retention index (RI) and mass spectrum (MS) with those of an authentic compound analyzed under identical experimental conditions; B-level: agreement of retention index ( $\Delta$ RI < 20) and mass spectrum (match > 900); C-level: at least  $\Delta$ RI < 20 or mass spectrum similarity match > 800
